# Supplementary material for: PACAP and VIP Modulate LPS-Induced Microglial Activation and Trigger Distinct Phenotypic Changes in Murine BV2 Microglial Cells
Source: Int J Mol Sci. 2021 Oct 11;22(20):10947. doi: 10.3390/ijms222010947 (PMC8535941; doi:10.3390/ijms222010947)
Supplement: Supplementary file 1 [file ijms-22-10947-s001.zip › Supplementary File S2.pdf]

## Methodology used to measure wound area using ImageJ

1. Open image
2. Image → Type → 8-bit
3. Image → Adjust → Threshold → reset
4. Process → FFT → Bandpass Filter → OK
5. Image → Adjust → Threshold
6. Process → Filters → Minimum → Radius 7 pixels → OK
7. Magic wand → click wound area (the selected wound area is contoured in yellow)
8. Analyze → Measure

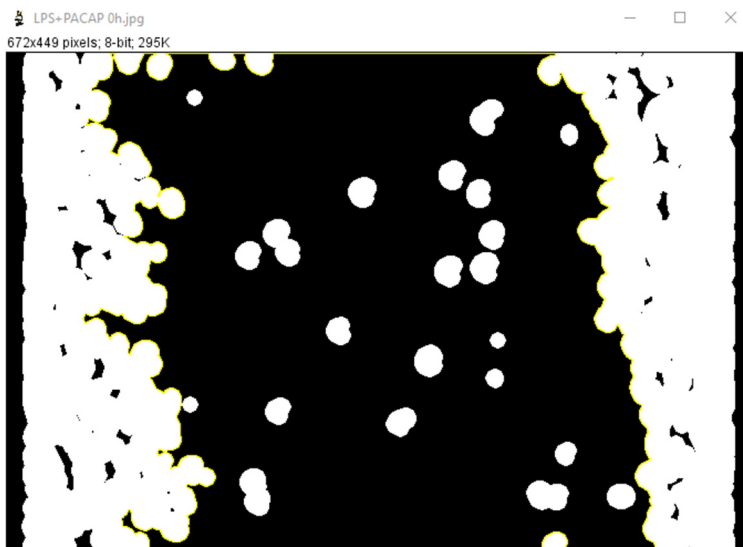

9. Image → Adjust → Threshold → unclicked Dark background
10. Analyse → Tools → ROI manager
11. Manually select each cell (within the wound area) using the Wand Tool and clicked Add (or press "t" (in this example 24 cells were found to occupy the wounded area))

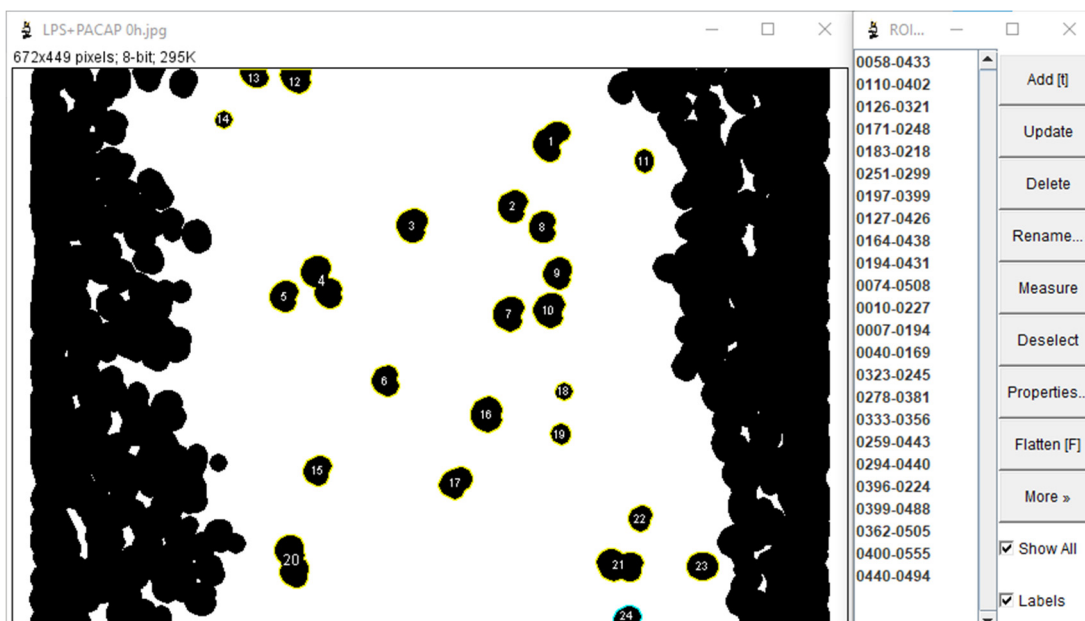

## 12. Analyze → Measure

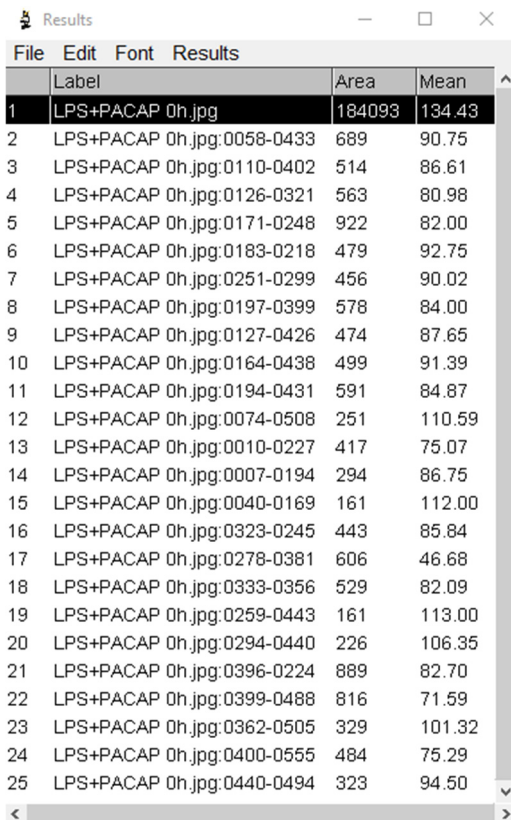

|    | Label                      | Area   | Mean   |
|----|----------------------------|--------|--------|
| 1  | LPS+PACAP 0h.jpg           | 184093 | 134.43 |
| 2  | LPS+PACAP 0h.jpg:0058-0433 | 689    | 90.75  |
| 3  | LPS+PACAP 0h.jpg:0110-0402 | 514    | 86.61  |
| 4  | LPS+PACAP 0h.jpg:0126-0321 | 563    | 80.98  |
| 5  | LPS+PACAP 0h.jpg:0171-0248 | 922    | 82.00  |
| 6  | LPS+PACAP 0h.jpg:0183-0218 | 479    | 92.75  |
| 7  | LPS+PACAP 0h.jpg:0251-0299 | 456    | 90.02  |
| 8  | LPS+PACAP 0h.jpg:0197-0399 | 578    | 84.00  |
| 9  | LPS+PACAP 0h.jpg:0127-0426 | 474    | 87.65  |
| 10 | LPS+PACAP 0h.jpg:0164-0438 | 499    | 91.39  |
| 11 | LPS+PACAP 0h.jpg:0194-0431 | 591    | 84.87  |
| 12 | LPS+PACAP 0h.jpg:0074-0508 | 251    | 110.59 |
| 13 | LPS+PACAP 0h.jpg:0010-0227 | 417    | 75.07  |
| 14 | LPS+PACAP 0h.jpg:0007-0194 | 294    | 86.75  |
| 15 | LPS+PACAP 0h.jpg:0040-0169 | 161    | 112.00 |
| 16 | LPS+PACAP 0h.jpg:0323-0245 | 443    | 85.84  |
| 17 | LPS+PACAP 0h.jpg:0278-0381 | 606    | 46.68  |
| 18 | LPS+PACAP 0h.jpg:0333-0356 | 529    | 82.09  |
| 19 | LPS+PACAP 0h.jpg:0259-0443 | 161    | 113.00 |
| 20 | LPS+PACAP 0h.jpg:0294-0440 | 226    | 106.35 |
| 21 | LPS+PACAP 0h.jpg:0396-0224 | 889    | 82.70  |
| 22 | LPS+PACAP 0h.jpg:0399-0488 | 816    | 71.59  |
| 23 | LPS+PACAP 0h.jpg:0362-0505 | 329    | 101.32 |
| 24 | LPS+PACAP 0h.jpg:0400-0555 | 484    | 75.29  |
| 25 | LPS+PACAP 0h.jpg:0440-0494 | 323    | 94.50  |

13. Copy results in Excel sheet → Subtract the area of each cell (values in row 2-25) from the total wound area (highlighted in black in the table above)
14. Repeat steps 1-13 for all the images x treatment/condition
15. Average results in each condition and normalise as % of control
